# Supplementary material
Source: MDPI journal article supplement (https://www.mdpi.com/2071-1050/14/5/2642)
Supplement: s1 [file s1]

# An Infrastructure for Computable Food Systems: Ontological Modeling of a Smart Foodshed

A Workshop at the 2019 IC-FOODS Conference

**Purpose:** Advancement of analyses linking land use, agriculture, food processing, diet and health for decision-making.

**Aim:** To produce a framework that enumerates and connects ontologies, computable vocabularies, and datasets.

**Use Case/Problem Statement:** Does food composition and nutrient variability in agricultural production impact health in an integrated food system?

**Format:** Facilitated large and small group discussions.

## Agenda (subject to change):

| Time        | Activity                                             | Presenter                         |
|-------------|------------------------------------------------------|-----------------------------------|
| 8:30-9:00   | Tutorial: Ontology 101                               | Matthew Lange                     |
| 9:00-9:30   | Tutorial: PPOD+ and FoodON ontology                  | Allan Hollander and Damion Dooley |
| 9:30-10:00  | Problem statement and concept mapping group activity | Ayaz Hyder                        |
| 10:00-10:10 | Break and form groups                                |                                   |

|             | Food Systems and Health Group                     |                | Food Composition & Ontology Group                              |                 |
|-------------|---------------------------------------------------|----------------|----------------------------------------------------------------|-----------------|
| Time        | Activity                                          | Presenter      | Activity                                                       | Presenter       |
| 10:10-10:50 | Key stakeholders with Power vs. Interest mapping  | Ayaz           | Key existing ontologies with Relevance vs. Development mapping | Damion          |
| 10:50-11:20 | Linking stakeholders to PPOD+                     | Allan          | Identifying missing ontologies                                 | Matt            |
| 11:20-11:30 | Break                                             |                |                                                                |                 |
| 11:30-12:30 | Dataset elicitation and linking datasets to PPOD+ | Allan and Ayaz | Linking Ontologies to PPOD+                                    | Matt and Damion |
| 12:30-1:30  | Lunch                                             |                |                                                                |                 |

| Time      | Activity                                                            | Lead |
|-----------|---------------------------------------------------------------------|------|
| 1:30-2:30 | Sharing of outputs from group sessions                              | Matt |
| 2:30-2:45 | Coffee/Networking                                                   |      |
| 2:45-3:45 | Mapping existing/new ontologies ↔ datasets ↔ stakeholders via PPOD+ | Matt |
| 3:45-4:00 | Discussion of next steps, papers and future workshops               | Matt |

**Additional resources:**

1. Ontologies (PPOD, Issues/indicators, expertise, standards, taste, etc.)
  - a. PPOD: <https://github.com/adhollander/ppod>
  - b. FoodOn: [www.foodon.org](http://www.foodon.org)
  - c. The OBO Foundry: <http://obofoundry.org>

**Contact information for workshop presenters:**

1. Matthew Lange: [mclange@ucdavis.edu](mailto:mclange@ucdavis.edu)
2. Damion Dooley: [damion.dooley@bccdc.ca](mailto:damion.dooley@bccdc.ca)
3. Allan Hollander: [adhollander@ucdavis.edu](mailto:adhollander@ucdavis.edu)
4. Ayaz Hyder: [hyder.22@osu.edu](mailto:hyder.22@osu.edu)
